# Supplementary material for: Characterization of the Trans-Epithelial Transport of Green Tea (C. sinensis) Catechin Extracts with In Vitro Inhibitory Effect against the SARS-CoV-2 Papain-like Protease Activity
Source: MDPI journal article supplement (doi:10.3390/molecules26216744), 2021-11-08
Supplement: s1 [file s1]

## **Supplementary Material**

### **Untargeted analytical approach for the screening, identification, and characterization of the trans-epithelial transport of green tea (*Camellia sinensis*) catechin extracts with in vitro inhibitory effect against the SARS-Cov-2 papain-like protease activity**

Carmela Maria Montone<sup>1</sup>, Sara Elsa Aita<sup>1</sup>, Anna Arnoldi<sup>2</sup>, Anna Laura Capriotti<sup>1\*</sup>, Chiara Cavaliere<sup>1</sup>, Andrea Cerrato<sup>1</sup>, Carmen Lammi<sup>2\*</sup>, Susy Piovesana<sup>1</sup>, Giulia Ranaldi<sup>3</sup>, Aldo Laganà<sup>1,4</sup>

<sup>1</sup>Dipartimento di Chimica, Università di Roma La Sapienza, Piazzale Aldo Moro 5, 00185 Roma, Italy

<sup>2</sup>Dipartimento di Scienze Farmaceutiche, Università degli Studi di Milano La Statale, Via Mangiagalli, 25, 20133 Milano, Italy

<sup>3</sup>CREA, Food and Nutrition Research Centre, Rome, Italy

<sup>4</sup>CNR NANOTEC, Campus Ecotekne, University of Salento, Via Monteroni, 73100 Lecce, Italy

**\*\* These authors equally contributed to this work**

**\*Corresponding author:** Anna Laura Capriotti

Dipartimento di Chimica, Università degli Studi di Roma La Sapienza  
Piazzale Aldo Moro 5  
00185 Rome, Italy

E-mail: [annalaura.capriotti@uniroma1.it](mailto:annalaura.capriotti@uniroma1.it)

T (+39) 06 4991 3945

**\*Co-Corresponding author:** Carmen Lammi

Dipartimento di Scienze farmaceutiche, Università degli Studi di Milano

Via Mangiagalli, 25

20133 Milan, Italy

E-mail: [carmen.lammi@unimi.it](mailto:carmen.lammi@unimi.it)

T (+39) 02503 19372

## **Content**

Table S1. Total phenolic content (TPC) measured for the 6 purified fractions (F1-F6).

**Table S1:** Total phenolic content (TPC) measured for the 6 purified fractions (F1-F6) and the crude green tea extract. The TPC was calculated by the following equation:

$$y = -4247.9\, x^2 + 14093x + 113.06$$

$$R^2 = 0.9974$$

|               | TPC ± sd    |
|---------------|-------------|
|               | (mg GAE/mL) |
| Fraction1     | 5.0 ± 0.3   |
| Fraction2     | 5.9 ± 0.2   |
| Fraction3     | 0.7 ± 0.0   |
| Fraction4     | 15.2 ± 0.1  |
| Fraction5     | 4.5 ± 0.3   |
| Fraction6     | 0.2 ± 0.0   |
| Crude Extract | 16.9 ± 0.5  |
